# Supplementary material for: Bony labyrinth morphology clarifies the origin and evolution of deer
Source: PubMed Central journal article supplement (PMC5640792; doi:10.1038/s41598-017-12848-9), 2017-10-13
Supplement: 41598_2017_12848_MOESM1_ESM.pdf [file 41598_2017_12848_MOESM1_ESM.pdf]

## Bony labyrinth morphology clarifies the origin and evolution of deer

Bastien Mennecart<sup>1\*</sup>, Daniel DeMiguel<sup>2</sup>, Faysal Bibi<sup>3</sup>, Gertrud E. Rössner<sup>4</sup>, Grégoire Métais<sup>5</sup>, James M. Neenan<sup>6</sup>, Shiqi Wang<sup>7</sup>, Georg Schulz<sup>8</sup>, Bert Müller<sup>8</sup>, Loïc Costeur<sup>1</sup>

<sup>1</sup> *Naturhistorisches Museum Basel, Augustinergasse 2, 4001 Basel, Switzerland*

<sup>2</sup> *ICTA-ICP, Edifici Z, c/de les columnes s/n, Universitat Autònoma de Barcelona, 08193 Cerdanyola del Vallès, Barcelona, Spain*

<sup>3</sup> *Museum für Naturkunde Berlin, Leibniz Institute for Evolution and Biodiversity Science Invalidenstraße 43, 10115 Berlin, Germany*

<sup>4</sup> *Bayerische Staatssammlung für Paläontologie und Geologie, Richard-Wagner-Strasse 10, 80333 Munich, Germany*

<sup>5</sup> *CR2P - Centre de Recherches sur la Paléobiodiversité et les Paléoenvironnements, UMR 7207, Muséum National d'Histoire Naturelle, CNRS, UPMC, Sorbonne Universités. MNHN, CP38, 8 rue Buffon, 75005 Paris, France*

<sup>6</sup> *Oxford University Museum of Natural History, Parks Road, Oxford, OX1 3PW, United Kingdom*

<sup>7</sup> *Institute of Vertebrate Paleontology and Paleoanthropology, Chinese Academy of Sciences, 142 Xizhimenwai Street, Beijing 100044, China*

<sup>8</sup> *University of Basel, Biomaterials Science Center, Department of Biomedical Engineering, Gewerbestrasse 14, 4123 Allschwil, Switzerland*

**Supplementary data 1.** Specific information of the scanned specimens. The anatomy corresponds to the scanned section. NMB 213 and NMB 583 are partial skeletons attributed at first to *Metacervocerus philisi*.

| Genus                 | species               | anatomy  | locality                  | locality age (Ma) | host institution | inventory number | instution scanner | Subfamily         |
|-----------------------|-----------------------|----------|---------------------------|-------------------|------------------|------------------|-------------------|-------------------|
| <i>Lagomeryx</i>      | <i>parvulus</i>       | skull    | Sandelzhausen (Ge)        | ca. 16            | BSPG             | 1959II16856      | BSPG              | Lagomerycinae     |
| <i>Procervulus</i>    | <i>praefluvidus</i>   | petrosal | Wintenshof West (Ge)      | ca. 18            | BSPG             | 1937II23339      | BMC               | Procervulinae     |
| <i>Procervulus</i>    | <i>praefluvidus</i>   | petrosal | Wintenshof West (Ge)      | ca. 18            | BSPG             | 1937II23340      | NMB               | Procervulinae     |
| <i>Procervulus</i>    | <i>praefluvidus</i>   | petrosal | Artenay (Fr)              | ca. 16.5          | NMB              | SO652 left       | NMB               | Procervulinae     |
| <i>Procervulus</i>    | <i>praefluvidus</i>   | petrosal | Artenay (Fr)              | ca. 16.5          | NMB              | SO652 right      | NMB               | Procervulinae     |
| <i>Procervulus</i>    | <i>praefluvidus</i>   | petrosal | Artenay (Fr)              | ca. 16.5          | NMB              | SO3521           | NMB               | Procervulinae     |
| <i>Procervulus</i>    | <i>ditotomus</i>      | skull    | Rauscheröd (Ge)           | ca. 16.5          | BSPG             | 1979XV555        | BSPG              | Procervulinae     |
| <i>Heteroprox</i>     | <i>lartett</i>        | petrosal | Steinheim (Ge)            | ca. 13.5          | NMB              | Sth1343a         | NMB               | Procervulinae     |
| <i>Heteroprox</i>     | <i>lartett</i>        | petrosal | Steinheim (Ge)            | ca. 13.5          | NMB              | Sth2390b         | NMB               | Procervulinae     |
| <i>Heteroprox</i>     | <i>lartett</i>        | petrosal | Steinheim (Ge)            | ca. 13.5          | NMB              | 2391a            | NMB               | Procervulinae     |
| <i>Heteroprox</i>     | <i>lartett</i>        | petrosal | Steinheim (Ge)            | ca. 13.5          | NMB              | 2394a            | NMB               | Procervulinae     |
| <i>Heteroprox</i>     | <i>lartett</i>        | petrosal | Steinheim (Ge)            | ca. 13.5          | NMB              | 2394b            | NMB               | Procervulinae     |
| <i>Heteroprox</i>     | <i>lartett</i>        | petrosal | Sansan (Fr)               | ca. 15            | MNHN             | Sa9956           | MNHN              | Procervulinae     |
| <i>Dicrocerus</i>     | <i>elegans</i>        | skull    | Sansan (Fr)               | ca. 15            | MNHN             | SA10150          | MNHN              | Dicrocerinae      |
| <i>Dicrocerus</i>     | <i>elegans</i>        | skull    | Sansan (Fr)               | ca. 15            | NMB              | Se5293           | NMB               | Dicrocerinae      |
| <i>Dicrocerus</i>     | <i>elegans</i>        | petrosal | Sansan (Fr)               | ca. 15            | MNHN             | Sa9954           | MNHN              | Dicrocerinae      |
| <i>Dicrocerus</i>     | <i>elegans</i>        | petrosal | Sansan (Fr)               | ca. 15            | MNHN             | Sa9957           | MNHN              | Dicrocerinae      |
| <i>Dicrocerus</i>     | <i>elegans</i>        | petrosal | Sansan (Fr)               | ca. 15            | MNHN             | Sa10193          | MNHN              | Dicrocerinae      |
| <i>Dicrocerus</i>     | <i>elegans</i>        | petrosal | Sansan (Fr)               | ca. 15            | MNHN             | Sa9911           | MNHN              | Dicrocerinae      |
| <i>Dicrocerus</i>     | <i>elegans</i>        | petrosal | Sansan (Fr)               | ca. 15            | MNHN             | Sa10191          | MNHN              | Dicrocerinae      |
| <i>Dicrocerus</i>     | <i>elegans</i>        | petrosal | Sansan (Fr)               | ca. 15            | MNHN             | Sa9801           | MNHN              | Dicrocerinae      |
| <i>Euprox</i>         | <i>furcatus</i>       | skull    | Epptshausen (Ge)          | ca. 13            | Hiller           | Slg. Hiller E5   | NMB               | Stem Cervinae     |
| <i>Euprox</i>         | <i>furcatus</i>       | skull    | Abocador de Can Mata (Sp) | ca. 12            | ICP              | IPS 4444-1       | MNCN              | Stem Cervinae     |
| <i>Euprox</i>         | <i>furcatus</i>       | skull    | Steinheim (Ge)            | ca. 13.5          | NMB              | Sth.2394c        | NMB               | Stem Cervinae     |
| <i>Eostylloceros</i>  | <i>hezhenensis</i>    | skull    | Goujashan (Ch)            | ca. 8             | IVPP             | V19059           | IVPP              | stem Cervidae     |
| <i>Muntiacus</i>      | <i>muntjak</i>        | skull    | unknown                   | 0                 | NMB              | C.2408           | NMB               | Cervinae          |
| „ <i>Cervus</i> “     | <i>ruscinensis</i>    | skull    | Perpignan (Fr)            | 4.0-5.0           | CCEC             | Pp148            | NMB               | Cervinae          |
| <i>Eucladoceros</i>   | <i>clenoides</i>      | petrosal | Senèze (Fr)               | ca. 2             | NMB              | Se1797           | NMB               | Cervinae          |
| <i>Eucladoceros</i>   | <i>clenoides</i>      | petrosal | Senèze (Fr)               | ca. 2             | NMB              | Se981            | NMB               | Cervinae          |
| <i>Eucladoceros</i>   | <i>clenoides</i>      | petrosal | Senèze (Fr)               | ca. 2             | NMB              | Se557            | NMB               | Cervinae          |
| <i>Cervus</i>         | <i>elaphus</i>        | skull    | unknown                   | 0                 | NMB              | 11147            | NMB               | Cervinae          |
| <i>Rusa</i>           | <i>timorensis</i>     | skull    | Lamontjong (Id)           | 0                 | NMB              | 3657             | NMB               | Cervinae          |
| <i>Cervus</i>         | <i>nippon</i>         | skull    | unknown                   | 0                 | NMB              | 6106             | NMB               | Cervinae          |
| <i>Dama</i>           | <i>dama</i>           | skull    | Kleinriehen (Ch)          | 0                 | NMB              | 3186             | NMB               | Cervinae          |
| <i>Dama</i>           | <i>euryonos</i>       | petrosal | Val d'Arno (It)           | ca. 1.5           | NMB              | V.A.1642         | NMB               | Cervinae          |
| <i>Megaloceros</i>    | <i>giganteus</i>      | skull    | Westown Naul (Ir)         | 13.7-12.6 ka      | NHML             | M2326            | NHML              | Cervinae          |
| <i>Axis</i>           | <i>axis</i>           | skull    | Zoo Basel (Ch)            | 0                 | NMB              | C.3718           | NMB               | Cervinae          |
| <i>Metacervocerus</i> | <i>philtst1</i>       | petrosal | Senèze (Fr)               | ca. 2             | NMB              | Se583            | NMB               | Cervinae          |
| <i>Metacervocerus</i> | <i>philtst2</i>       | skull?   | Senèze (Fr)               | ca. 2             | NMB              | Se213            | NMB               | Cervinae          |
| <i>Crotzetoceros</i>  | <i>pyreanticus</i>    | skull    | Perpignan (Fr)            | 4.0-5.0           | CCEC             | Pp116            | NMB               | ?Stem Capreolinae |
| <i>Crotzetoceros</i>  | <i>ramosus</i>        | skull    | Elouatres (Fr)            | ca. 3             | NMB              | P.r.r.65         | NMB               | ?Stem Capreolinae |
| <i>Odocoileus</i>     | <i>virgaticus</i>     | skull    | unknown (Ve)              | 0                 | NMB              | 9872             | NMB               | Capreolinae       |
| <i>Odocoileus</i>     | <i>lucasi</i>         | skull    | Missouri (USA)            | 2.6-0             | BSPG             | 2012I77          | BSPG              | Capreolinae       |
| <i>Odocoileus</i>     | cf. <i>virgaticus</i> | skull    | Michigan (USA)            | 2.6-0             | BSPG             | 2015I37          | BSPG              | Capreolinae       |
| <i>Mazama</i>         | <i>americana</i>      | skull    | unknown (Ir)              | 0                 | NMB              | 2315             | NMB               | Capreolinae       |
| <i>Pudu</i>           | <i>pudu</i>           | skull    | unknown (Cl)              | 0                 | NMB              | C2209            | NMB               | Capreolinae       |
| <i>Hydropotes</i>     | <i>inermis</i>        | skull    | Zoo Basel (Ch)            | 0                 | NMB              | 9892             | NMB               | Capreolinae       |
| <i>Capreolus</i>      | <i>capreolus</i>      | skull    | unknown                   | 0                 | NMB              | 6212             | NMB               | Capreolinae       |
| <i>Alces</i>          | <i>alces</i>          | skull    | unknown                   | 0                 | NMB              | 2198             | NMB               | Capreolinae       |

**Supplementary data 2.** Canonical Variate analyses on the different regions of the bony labyrinth (semi-circular canal, oval window, cochlea not shown). The results show the variation of the studied structure depending of the considered clade subfamilies (Procervulinae, Dicrocerinae, Cervinae, and Capreolinae).

Statistical results are provided in dataset1

**1 Canonical Variate analyses of the anterior semi-circular canal landmarks.**

Along CV1, the value -1.5 permits to separate the Cervinae from the other Cervidae due to a squarer canal. Along CV2, the value -0.5 permits to separate the Cervinae and Procervulinae from the Dicrocerinae and Capreolinae due to an ovoid anteriorly antero-upper part.

anterior semi circular canal

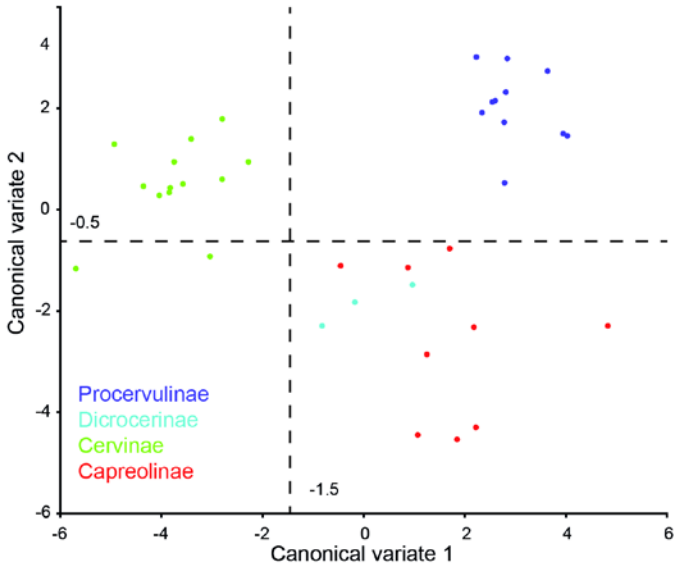

CV1 -6.0

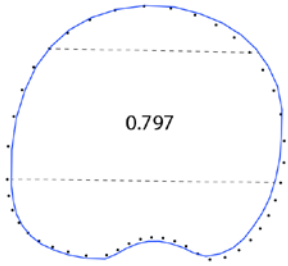

CV1 -1.5

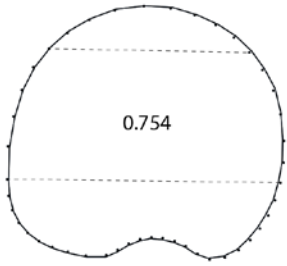

CV1 +5.0

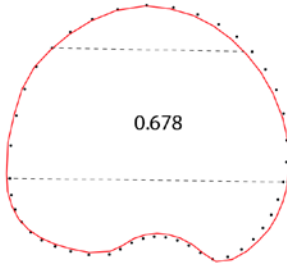

CV2 -5.0

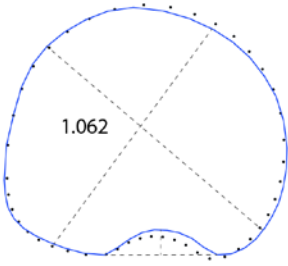

CV2 -0.5

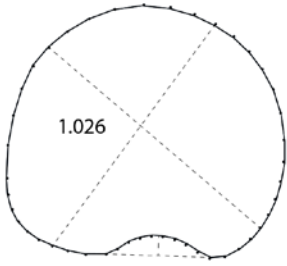

CV2 +3.0

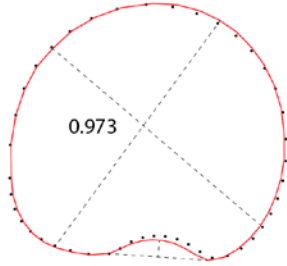

## 2 Canonical Variate analyses of the posterior semi-circular canal landmarks.

Along CV1, the values lower -2.0 permits characterise the Capreolinae (ovoid posteriorly posterior semi-circular canal and well rounded posterior ampulla), between -2.0 and +1.0 the Procervulinae (rounded posterior semi-circular canal and rounded posterior ampulla), and bigger than +1.0 the Cervinae and Dicrocerinae (ovoid posteriorly anteriorly semi-circular canal and flattened posterior ampulla). Along CV2, the value +1.5 permits to separate the Procervulinae from the other Cervidae due to a higher than wide posterior semi-circular canal.

posterior semi circular canal

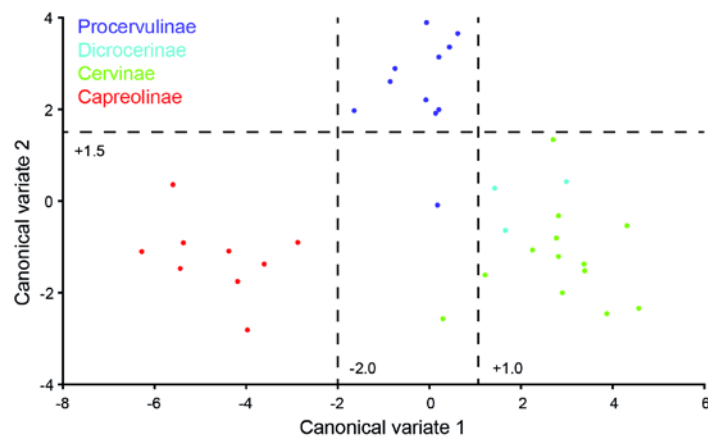

CV1 -7.0

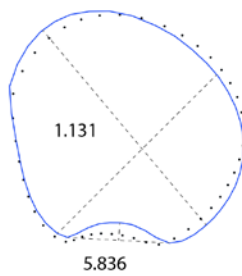

CV1 -2.0

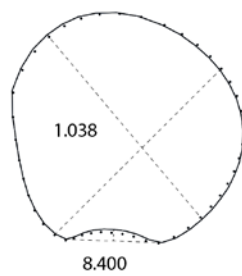

CV1 +1.0

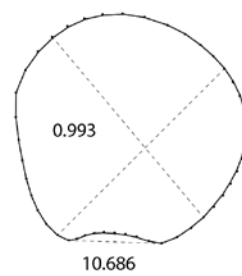

CV1 +5.0

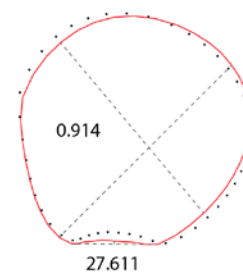

CV2 -3.0

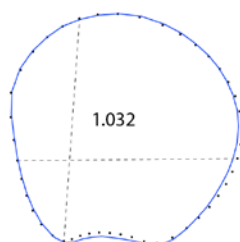

CV2 +1.5

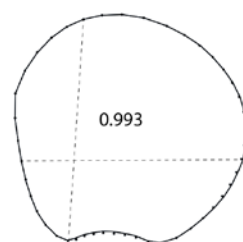

CV2 +4.0

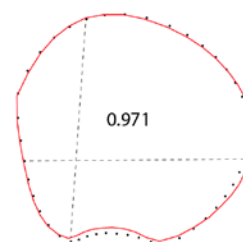

**3 Canonical Variate analyses of the lateral semi-circular canal landmarks.**

Along CV1, the value +1.5 permits to separate the Procervulinae from the other Cervidae due to a ovoid anteriorly canal and a flattened lateral ampulla.

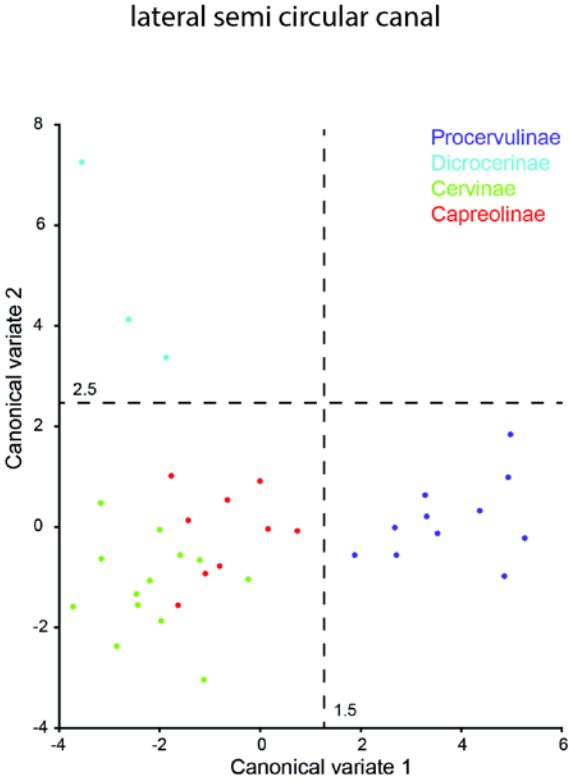

CV1 -4.0

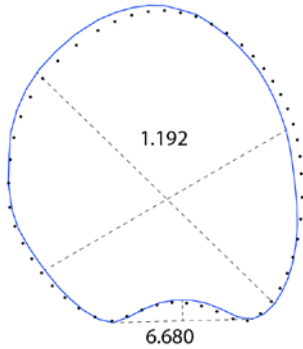

CV1 +1.5

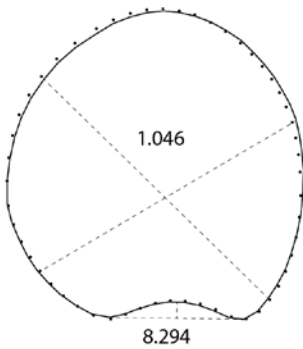

CV1 +6.0

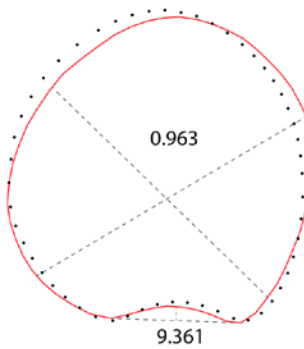

CV2 -3.0

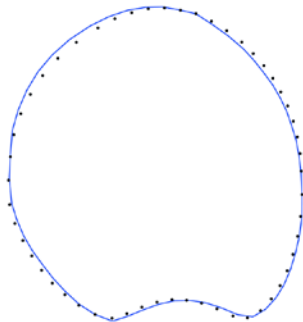

CV2 +2.5

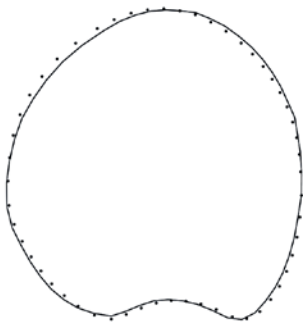

CV2 +8.0

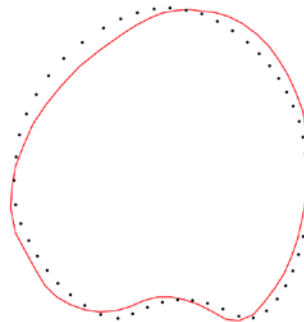

#### 4 Canonical Variate analyses of the Fenestra vestibuli landmarks.

Along CV2, the values lower than +0.0 permits to separate the Cervinae from the other Cervidae due to a more elongated fenestra.

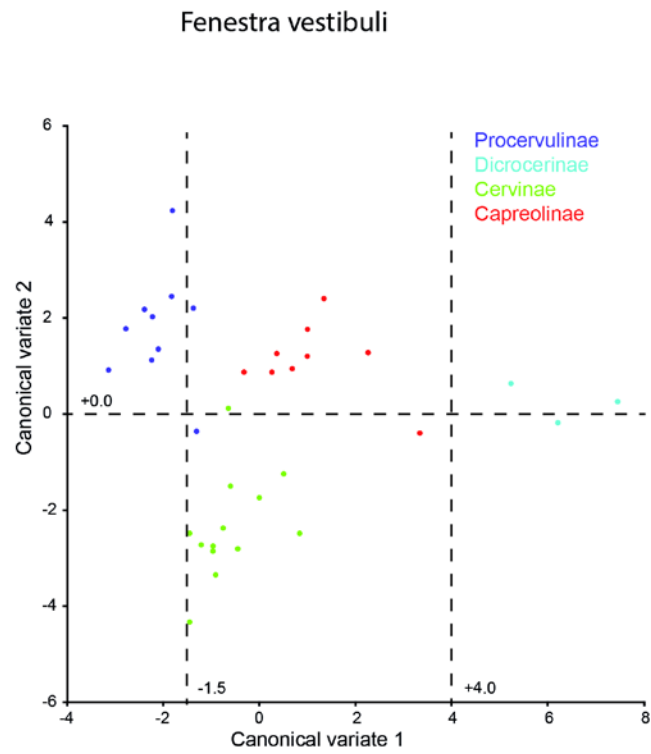

CV1 -4.0

CV1 -1.5

CV1 +4.0

CV1 +8.0

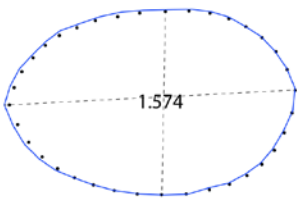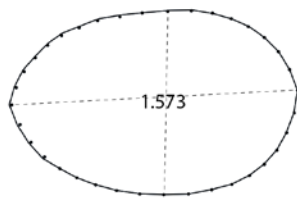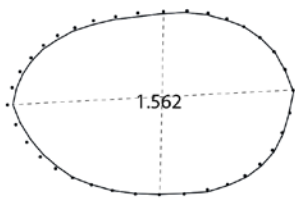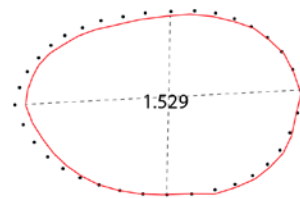

CV2 -5.0

CV2 +0.0

CV2 +5.0

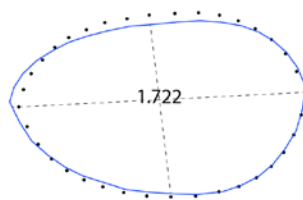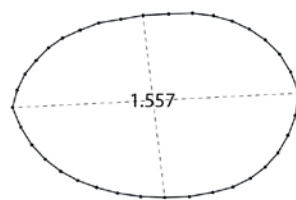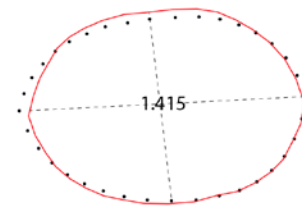

## 5 Canonical Variate analyses of the cochlea thickness landmarks.

Along CV1, the value -1.0 permits to separate the Cervinae from the other Cervidae due to a clear asymmetrical first turn of the cochlea. Along CV2, the value -1.0 permits to separate the Capreolinae from the other Cervidae due to an enlarged second turn of the cochlea.

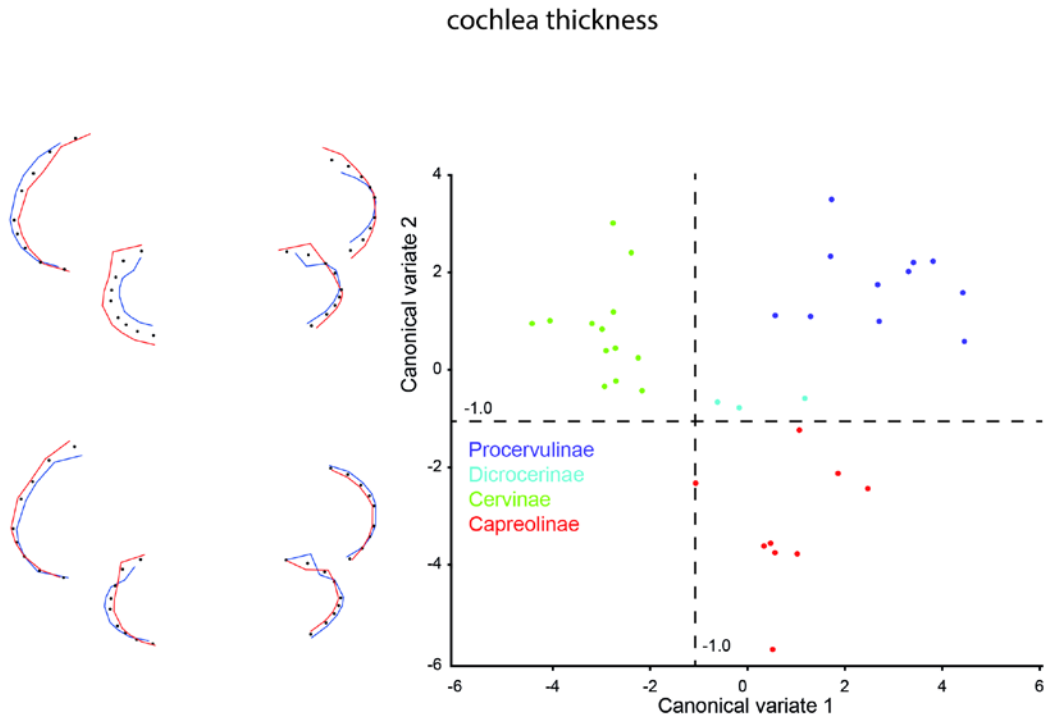

CV1 -7.0

CV1 -1.0

CV1 +5.0

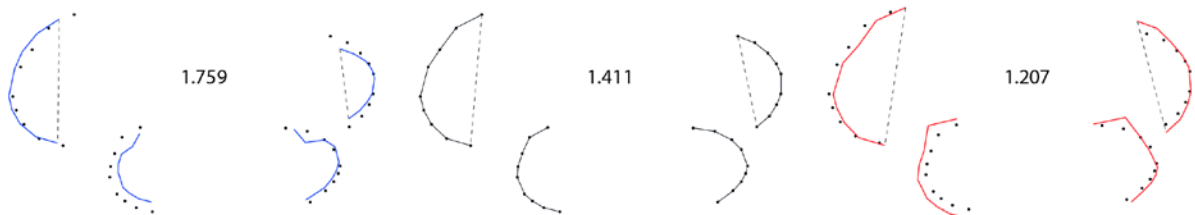

CV2 -4.0

CV2 -1.0

CV2 +4.0

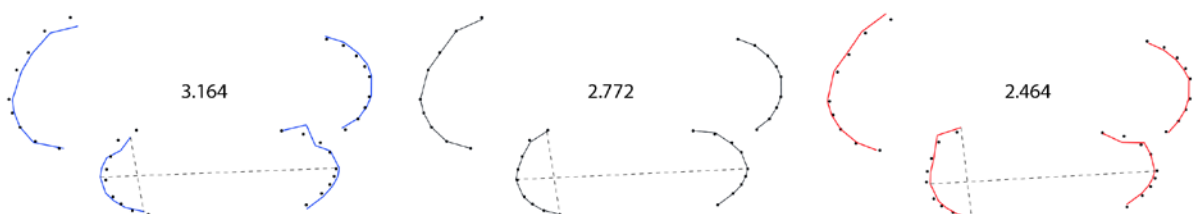



## 6 Canonical Variate analyses of the first turn of the cochlea landmarks.

Along CV1, the value -1.0 permits to separate the Cervinae from the other Cervidae due to a tightened second turn. Along CV2, the value +1.5 permits to separate the Capreolinae from the other Cervidae due to first turn width ratio starting narrow.

cochlea first turn

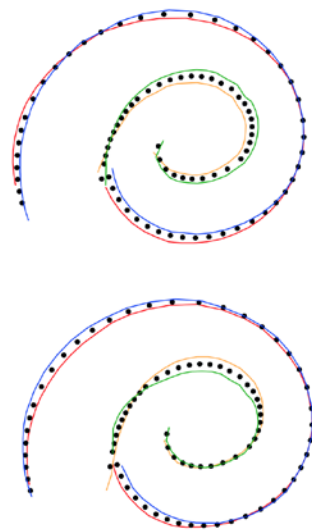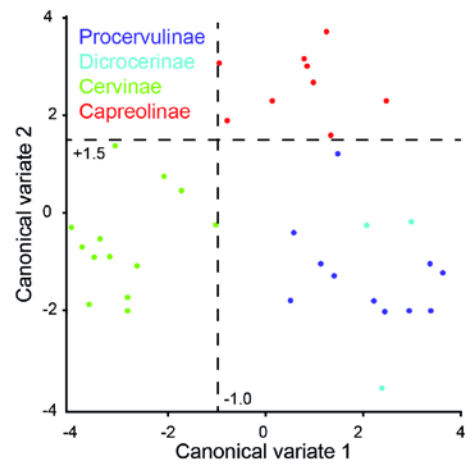

CV1 -4.0

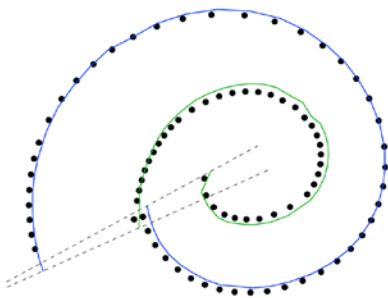

CV1 -1.0

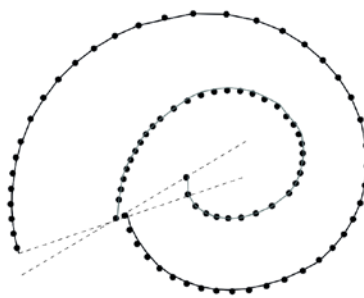

CV1 +4.0

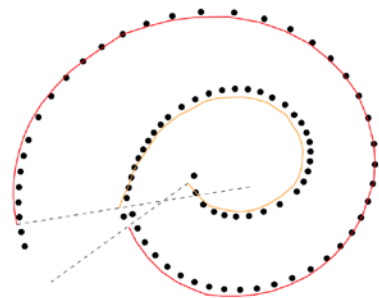

CV2 -4.0

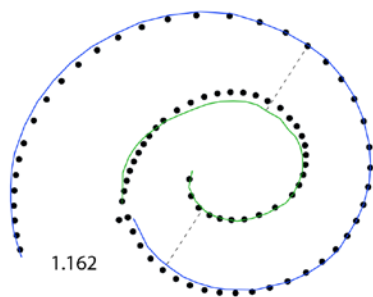

CV2 +1.5

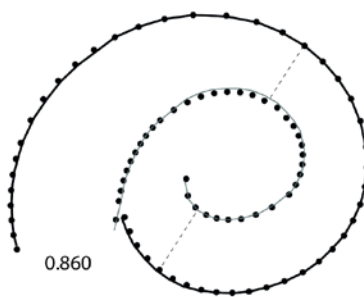

CV2 +4.0

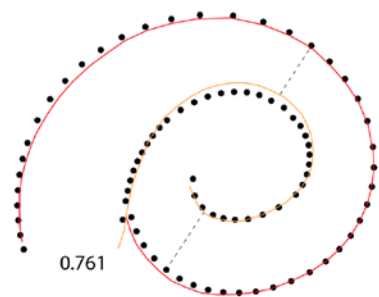

**Supplementary data 3.** Data matrix (nexus format) and character list used in the cladistics analyses with associated resulting consensus tree.

### List of characters

Characters 1–7, 13 follow Ekdale 2013, Macrini et al. 2013, and Mennecart et al. 2016. The others are original.

- 1 Number of cochlear turns: equal or less than two (0); between two and three (1); equal or more than three (2)
- 2 Insertion of the lateral semi-circular canal in the vestibule towards the posterior ampulla: low in posterior ampulla (0); high dorsally between posterior ampulla and common crus (1); high in posterior ampulla (2); anterior to posterior ampulla in vestibule (3)
- 3 Length of vestibular aqueduct: less than the common crus (0); same as common crus (0); longer than common crus (2)
- 4 Shape of the endolymphatic sac: knob like (0); straight and funnel like (1); triangular in shape (2); pouch like (3)
- 5 Fusion of lateral semi-circular canal with posterior ampulla: absent (0); partial to complete fusion (1)
- 6 Relative thickness of basal cochlear turn: thick (0); thin (1)
- 7 Section of cochlear aqueduct: flat (0); ovoid to circular (1)
- 8 Vestibular aqueduct: straight (0); curved (1)
- 9 Endolymphatic sac: symmetrical (0); asymmetrical (1)
- 10 Cochlear aqueduct: short (0); long (1)
- 11 Cochlear aqueduct: curved (0); straight (1)
- 12 Shape anterior semi-circular canal: round (0); flat anteriorly (1)
- 13 Shape of posterior canal: straight (0); undulating (1)
- 14 Shape of posterior ampulla: well rounded ( $\text{ratio} < 8.400$ ) (0); rounded ( $8.400 < \text{ratio} < 10.686$ ) (1); flattened ( $\text{ratio} > 10.686$ ) (2)
- 15 Shape of posterior semi-circular canal: ovoid posteriorly ( $\text{ratio} > 1.038$ ) (0); rounded ( $1.038 > \text{ratio} > 0.993$ ) (1); ovoid anteriorly ( $\text{ratio} < 0.914$ ) (2)
- 16 Height of posterior semi-circular canal: higher than wide ( $\text{ratio} < 0.993$ ) (0); wider than high ( $\text{ratio} > 0.993$ ) (1)
- 17 Shape of the anterior semi-circular canal: squared ( $\text{ratio} > 0.754$ ) (0); rounded ( $\text{ratio} < 0.754$ ) (1)
- 18 Anterior semi-circular canal antero-upper part: ovoid posteriorly ( $\text{ratio} > 1.026$ ) (0); ovoid anteriorly ( $\text{ratio} < 1.026$ ) (1)
- 19 Anterior ampulla: rounded ( $\text{ratio} < 5.173$ ) (0); flattened ( $\text{ratio} > 5.173$ ) (1)
- 20 Shape of the lateral canal: ovoid posteriorly ( $\text{ratio} > 1.046$ ) (0); ovoid anteriorly ( $\text{ratio} < 1.046$ ) (1)

- 21 Lateral ampulla: flattened (ratio>8.294) (0); rounded (ratio<8.294) (1)
- 22 Fenestra vestibuli: elongated (ratio>1.557) (0); rounded (ratio<1.557) (1)
- 23 Cochlea second turn coil: enlarged (0); tightened (1)
- 24 Cochlea first turn width ratio: start enlarged (ratio>0.860) (0); start narrow (ratio<0.860) (1)
- 25 Cochlea first turn thickness: symmetrical (ratio<1.411) (0); asymmetrical (ratio>1.411) (1)
- 26 Cochlea second turn thickness: enlarged (ratio<2.772) (0); flattened (ratio>2.772) (1)

## References

- Ekdale, E. G. Comparative Anatomy of the Bony Labyrinth (Inner Ear) of Placental Mammals. *PLoS ONE* **10(8)**, e0137149 (2013).
- Macrini, T. E., Flynn, J. J., Ni, X., Croft, D. A., & Wyss, A. R. Comparative study of notoungulate (Placentalia, Mammalia) bony labyrinths and new phylogenetically informative inner ear characters. *J. Anat.* **223**, 442–461 (2013).
- Mennecart, B. *et al.* The petrosal bone and bony labyrinth of early to middle Miocene European deer (Mammalia, Cervidae) reveal their phylogeny. *J. Morphol.* **277**, 1329–1338 (2016).



### Phylogenetic tree of the Deer based on the above mentioned character matrix

For each node the list of the nonambiguous synapomorphies is given and each synapomorphy is represented by a black circle (strict synapomorphy) or an open white circle (homoplastic synapomorphy). The upper numbers indicate the character number and the lower numbers the states for these characters.

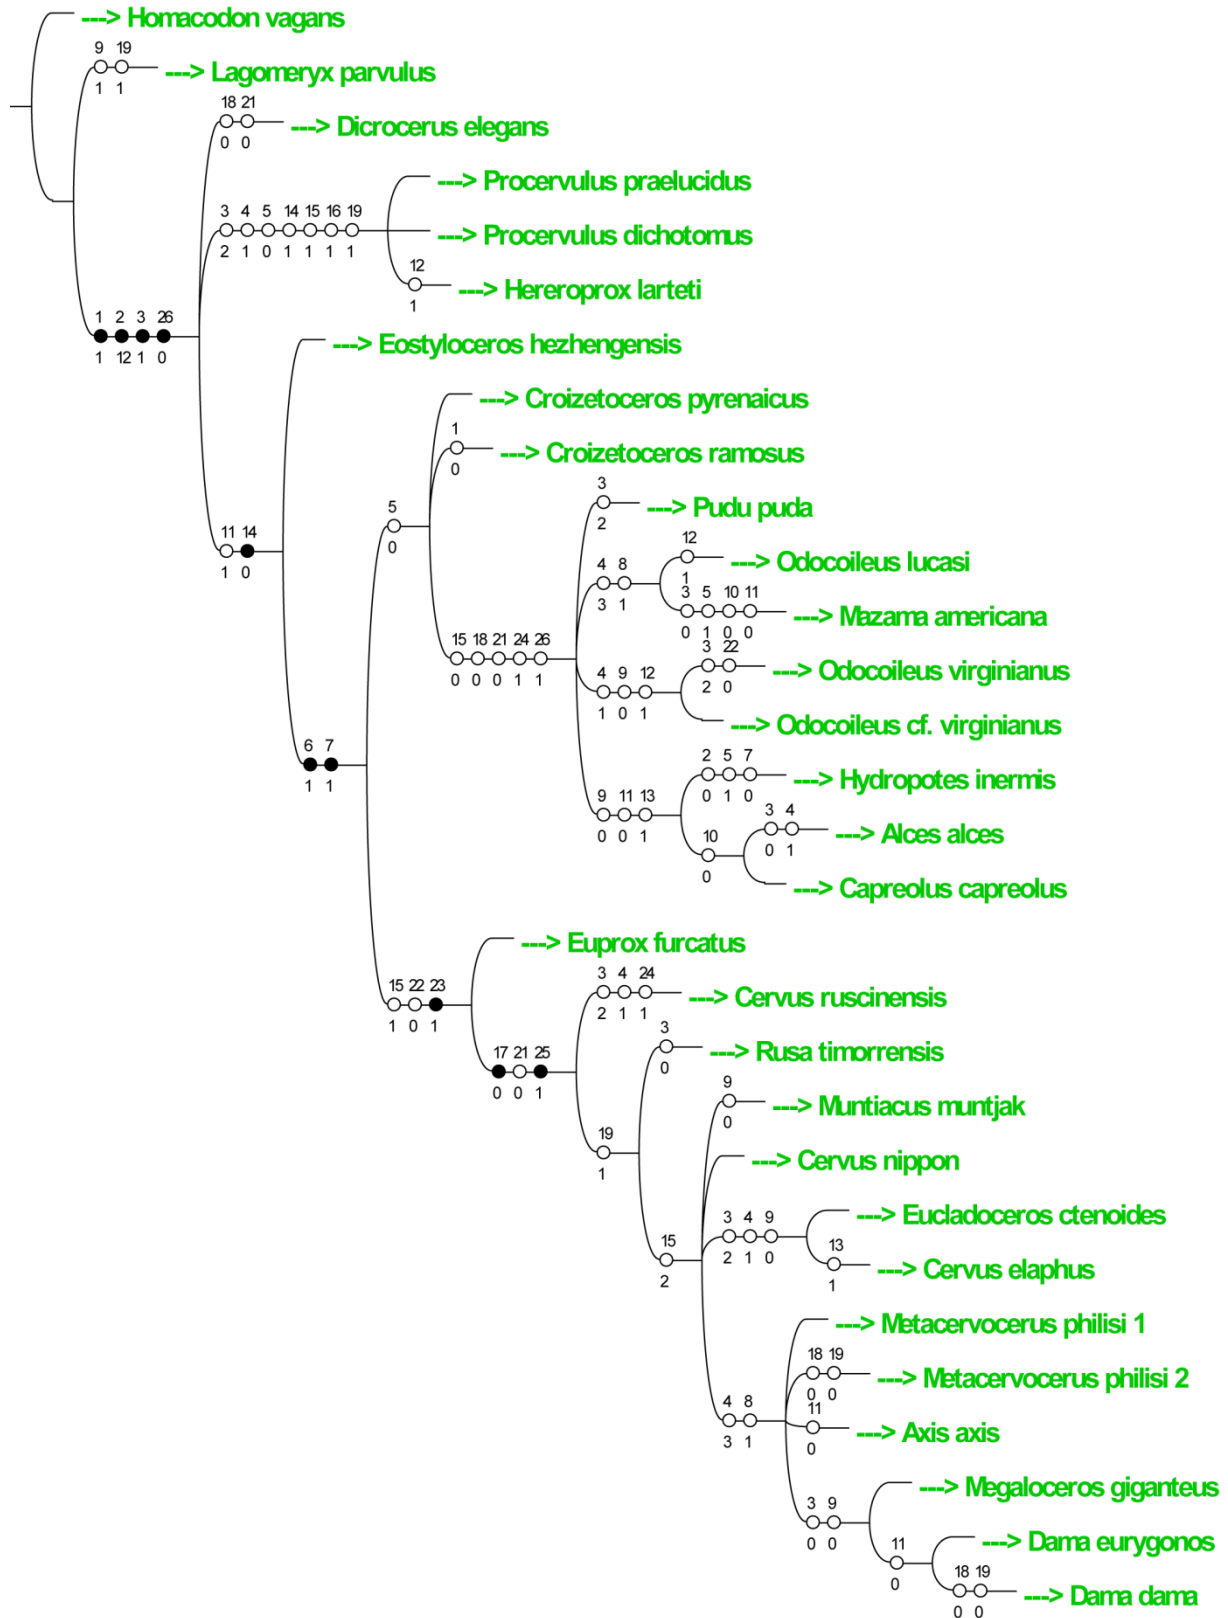

*Lagomeryx parvulus* is the sister taxon of the other antlered taxa (Figure 3). *L. parvulus* differs by 6 unambiguous plesiomorphic characters from the other species analysed, such as a short cochlea (1<sup>0</sup>) with an enlarged second turn (26<sup>0</sup>), a lateral semi-circular canal entering low in the posterior ampulla (2<sup>0</sup>), and a short vestibular aqueduct (3<sup>0</sup>). Procervulinae, consisting of *Procervulus* species and *Heteroprox larteti*, form a monophyletic clade well supported by the combination of 7 non-ambiguous, but homoplastic, characters (3<sup>2</sup>: elongated common crus; 4<sup>1</sup>: straight and funnel like endolymphatic sac; 5<sup>0</sup>: no fusion of lateral semi-circular canal with posterior ampulla; 14<sup>1</sup>: rounded posterior ampulla; 15<sup>1</sup> & 16<sup>1</sup>: rounded and wide posterior semi-circular canal; 19<sup>1</sup>: flattened anterior ampulla). *Dicrocerus elegans* and Procervulinae are placed in an unresolved trichotomy with all crown cervids and *Eostyloceros hezhengensis* (Figure 3). The latter is excluded from the crown Cervidae due to the absence of the two autapomorphies of the crown Cervidae: 6<sup>1</sup> (thin basal turn of the cochlea) and 7<sup>1</sup> (ovoid to circular section of the cochlear aqueduct). The inclusion of *Croizetoceros* species within the crown Cervidae, and especially within Capreolinae, is weakly supported by one homoplastic character (5<sup>0</sup>: no fusion of lateral semi-circular canal with posterior ampulla). The stem Cervinae position of *E. furcatus* is confirmed by (at least) three apomorphies of Cervinae (15<sup>1</sup>, 22<sup>0</sup>, 23<sup>1</sup>). The more derived, but rather enigmatic “*Cervus*” *ruscinensis* is the sister taxon to the crown Cervinae (sharing 17<sup>0</sup>, 21<sup>0</sup>, 25<sup>1</sup> with the crown Cervinae) (Figure 3). The crown Capreolinae and Cervinae are well-supported by 6 and 7 non-ambiguous characters respectively of the cochlea (Capreolinae: 24<sup>1</sup>, 26<sup>1</sup>; Cervinae: 22<sup>0</sup>, 23<sup>1</sup>, 25<sup>1</sup>) and semi-circular canals (Capreolinae: 5<sup>0</sup>, 15<sup>0</sup>, 18<sup>0</sup>, 21<sup>0</sup>; Cervinae: 15<sup>1</sup>, 17<sup>0</sup>, 21<sup>0</sup>) (Figure 3). A basal polytomy is observed within the crown Cervinae and crown Capreolinae. These clades are mainly supported by the open structures (endolymphatic sac, vestibular aqueduct) and the cochlear aqueduct supports closely related species apomorphies. *H. inermis*, *C. capreolus*, and *A. alces* constitute a monophyletic group (Figure 3) supported by not less than three non-ambiguous homoplastic characters (9<sup>0</sup> symmetrical endolymphatic sac, 11<sup>0</sup> curved cochlear aqueduct, and

13<sup>1</sup> undulating posterior canal). *H. inermis* is separated from *A. alces* and *C. capreolus* by a shorter cochlear aqueduct (10<sup>0</sup>). *Odocoileus* cf. *virginianus* and *O. virginianus* cluster together (three homoplastic characters: 4<sup>1</sup> triangular endolymphatic sac, 9<sup>0</sup> symmetrical endolymphatic sac, 12<sup>1</sup> flat anteriorly anterior semi-circular canal) and are separated from the clade including *Odocoileus lucasi* and *M. americana* (two homoplastic characters: 4<sup>3</sup> pouch like endolymphatic sac, 8<sup>1</sup> curved vestibular aqueduct). *Muntiacus muntjak* is placed in a clade with *Cervus* species and *R. timorensis* as sister taxon due the homoplastic and highly variable character of the posterior semi-circular canal shape (15). As in the Capreolinae terminal clades (e. g. *Mazama americana* and *Odocoileus lucasi*), the Cervinae terminal clades are supported by the shape of the endolymphatic sac (4, 9) and vestibular aqueduct (3, 8). *Eucladoceros ctenoides* and *Cervus elaphus* form a clade (Figure 3) supported by three non-ambiguous homoplastic characters (3<sup>2</sup>, 4<sup>1</sup>, 9<sup>0</sup>). The two specimens of “*Metacervocerus philisi*” are included in a basal polytomy with *Axis axis* and a well-supported clade formed by *M. giganteus*, *Dama eurygonos*, and *D. dama* (3<sup>0</sup>, 9<sup>0</sup>; Figure 3).

#### **Supplementary data 4.** Calibration points of the calibrated phylogenetic tree of the Cervidae.

Tree files are loaded in a separate file due to the size of the information

Dataset3 corresponds to the file All constrain tree.

Dataset4 corresponds to the file minimum constrain tree.

Dataset5 corresponds to the old Pecora tree.

#### **Methods**

In the Min Constraint analysis, the root age of Pecora sits at its maximum allowed limit (95% range 25-23.4 Ma), *E. furcatus* falls out of crown cervid, and the 95% age range estimate for Cervidae is 17.9-14.2 Ma (median 16 Ma). The All Constraints analysis, which is constrained to give a similar topology as the parsimony analyses (with *Euprox* allied to the Cervinae), gives a similar root age to that in the Min Constraints analysis, and a similar age for crown cervids (16.4-14.1 Ma, median 15.2 Ma). This shows that the inclusion of *Euprox furcatus* within the Cervidae changes little in the divergence estimates, which clearly push for the oldest possible ages across the tree. The Old Pecora analysis dated the node age for Pecora to 35-25.7 Ma, and crown Cervidae to 25-16 Ma (median 22.8 Ma) again showing that ages across the tree were largely determined by the root prior. Interestingly, the Old Pecora analysis placed (though with very low support) *Euprox furcatus* in the Cervinae, as in the parsimony analyses of the morphology-only dataset, and without need for topological constraints as in the All Constraints analysis. This indicates that the placement of *Euprox furcatus* is strongly affected by the rates of evolution calibrated by the morphological dataset.



## Deer Calibrations

| Genus                 | Species              | FAD Locality / MN Zone          | FAD | FAD Max | FAD Min | LAD    | LAD Max-Min | Notes                                                                                                                                                 | Reference                                                                                                                                                                                                                                                                         |
|-----------------------|----------------------|---------------------------------|-----|---------|---------|--------|-------------|-------------------------------------------------------------------------------------------------------------------------------------------------------|-----------------------------------------------------------------------------------------------------------------------------------------------------------------------------------------------------------------------------------------------------------------------------------|
| <i>Cervus</i> *       | <i>ruscinensis</i>   | MN15                            |     | 5       | 3.5     | MN15   | 5.0-3.5     |                                                                                                                                                       | Palombo & Valli 2003-2004                                                                                                                                                                                                                                                         |
| <i>Aïces</i>          | <i>aïces</i>         |                                 |     |         |         | Extant | 0           |                                                                                                                                                       |                                                                                                                                                                                                                                                                                   |
| <i>Axïs</i>           | <i>axïs</i>          |                                 |     |         |         | Extant | 0           |                                                                                                                                                       |                                                                                                                                                                                                                                                                                   |
| <i>Capreolus</i>      | <i>capreolus</i>     | MN20                            |     |         |         | Extant | 0           |                                                                                                                                                       | Palombo & Valli 2003-2004                                                                                                                                                                                                                                                         |
| <i>Cervus</i>         | <i>elaphus</i>       | MN20?-MN21                      |     |         |         | Extant | 0           |                                                                                                                                                       | Palombo & Valli 2003-2004                                                                                                                                                                                                                                                         |
| <i>Cervus</i>         | <i>niippon</i>       |                                 |     |         |         | Extant | 0           |                                                                                                                                                       |                                                                                                                                                                                                                                                                                   |
| <i>Grotzeloceros</i>  | <i>pyreanticus</i>   | Venta Del Moro                  |     | 7.1     | 5.3     |        |             | NOW database.                                                                                                                                         | Also Gentry et al. 1999; Palombo & Valli 2003-2004                                                                                                                                                                                                                                |
| <i>Grotzeloceros</i>  | <i>ramosus</i>       | La Calera                       |     | 4.2     | 3.4     |        |             | Now database oldest site.                                                                                                                             |                                                                                                                                                                                                                                                                                   |
| <i>Dama</i>           | <i>dama</i>          |                                 |     |         |         | Extant | 0           |                                                                                                                                                       |                                                                                                                                                                                                                                                                                   |
| <i>Dicroceros</i>     | <i>elegans</i>       | MN5                             |     | 17      | 15.2    |        |             | Now database. Only a single loc dated 20-17 but many dated 17-15.2, so this was chosen.                                                               |                                                                                                                                                                                                                                                                                   |
| <i>Euceladoceros</i>  | <i>ctenoides</i>     | MN16b                           |     | 3       | 2.5     | MN18   | 1.8-0.6     |                                                                                                                                                       | Palombo & Valli 2003-2004                                                                                                                                                                                                                                                         |
| <i>Euprox</i>         | <i>furcatus</i>      | MN 6                            |     | 15.2    | 12.5    |        |             | Now database. Two doubtful occurrences from MN5, but many localities from MN 6.                                                                       |                                                                                                                                                                                                                                                                                   |
| <i>Eutylloceros</i>   | <i>hezhen-gensis</i> |                                 |     | ca. 8   | ca. 8   | ca. 8  | ca. 8       | only one specimen known                                                                                                                               |                                                                                                                                                                                                                                                                                   |
| <i>Heteroprox</i>     | <i>laterit</i>       |                                 |     | 18      | 15.2    |        |             | Now database. Single oldest dated to 18-17 Ma, but many dated to 17-15.2, so 18-15.2 chosen.                                                          |                                                                                                                                                                                                                                                                                   |
| <i>Homacodon</i>      | <i>vagus</i>         | Central Great Plains CP34D, USA |     | 46.9    | 46.3    |        |             | Now database. Only locality for this species in the NOW database.                                                                                     | (1998). Evolution of Tertiary Mammals of North America: Volume 1, Terrestrial Carnivores, Ungulates, and Ungulate-like Mammals. Cambridge University Press.                                                                                                                       |
| <i>Hydropotes</i>     | <i>inermis</i>       |                                 |     |         |         | Extant | 0           |                                                                                                                                                       |                                                                                                                                                                                                                                                                                   |
| <i>Lagomeryx</i>      | <i>parvulus</i>      | MN4                             |     | 20      | 18      |        |             | Now database. Many localities, oldest among these dated to 20-18 Ma.                                                                                  |                                                                                                                                                                                                                                                                                   |
| <i>Mazama</i>         | <i>americana</i>     |                                 |     |         |         | Extant | 0           |                                                                                                                                                       |                                                                                                                                                                                                                                                                                   |
| <i>Megaloceros</i>    | <i>giganteus</i>     | Reflingen, Germany              |     | 0.301   | 0.242   |        |             | Now database. Oldest loc with most precise age range.                                                                                                 | Ziegler & Dean (1998). Mammalian fauna and biostratigraphy of the pre-Neanderthal site of Reflingen, Germany. Journal of Human Evolution                                                                                                                                          |
| <i>Metacervoceros</i> | <i>philitis</i>      | Apolakhta                       |     | 4.2     | 3.4     |        |             | Now database.                                                                                                                                         |                                                                                                                                                                                                                                                                                   |
| <i>Muntiacus</i>      | <i>muntjak</i>       |                                 |     |         |         | Extant | 0           |                                                                                                                                                       |                                                                                                                                                                                                                                                                                   |
| <i>Odocoileus</i>     | <i>virgaticus</i>    |                                 |     |         |         | Extant | 0           |                                                                                                                                                       |                                                                                                                                                                                                                                                                                   |
| <i>Odocoileus</i>     | <i>hucast</i>        |                                 |     |         |         | Extant | 0           |                                                                                                                                                       |                                                                                                                                                                                                                                                                                   |
| <i>Odocoileus</i>     | <i>sp.</i>           |                                 |     |         |         | Extant | 0           |                                                                                                                                                       |                                                                                                                                                                                                                                                                                   |
| <i>Procervivus</i>    | <i>dichotomus</i>    | Numerous, see notes             |     | 20      | 17      |        |             | Now database. Many localities, oldest among these dated to 20-19 Ma, but the vast majority to 18-17 Ma. So a wide range chosen to allow for 20-17 Ma. | Numerous localities in NOW database.                                                                                                                                                                                                                                              |
| <i>Procervivus</i>    | <i>praefluidens</i>  |                                 | MN3 | 20      | 18      |        |             | Now database. Many localities, oldest among these dated to 20-18 Ma.                                                                                  |                                                                                                                                                                                                                                                                                   |
| <i>Pseudodama</i>     | <i>eurymos</i>       | Farneta & Pitro, Italy          |     | 3.4     | 1.95    |        |             | Now database. Oldest 2 locs for 'Axis' eurymos.                                                                                                       | *di Stefano, Petronio & Sardella (2005). Large bovids and cervids from latest Villafranchian-Galerian faunas of Italy. Quaternaire, hors série 2 (): 95-102. Palombo (2005). Middle Pliocene - Late Pleistocene herbivore guilds of Italy. Quaternaire, hors série 2 (): 123-136. |
| <i>Pudu</i>           | <i>pudu</i>          |                                 |     |         |         | Extant | 0           |                                                                                                                                                       |                                                                                                                                                                                                                                                                                   |
| <i>Rusa</i>           | <i>timorensis</i>    |                                 |     |         |         | Extant | 0           |                                                                                                                                                       |                                                                                                                                                                                                                                                                                   |

## Nodes age

|                   | all constrain | range (95%) | min constrain | range (95%) | old Pecora | range (95%) |
|-------------------|---------------|-------------|---------------|-------------|------------|-------------|
| crown Ruminantia  | 24.79         | 25.0-24.1   | 24.66         | 25.0-23.4   | 31.36      | 35.0-25.7   |
| Cervidae/Bovoidea | 22.69         | 23.5-21.5   | 24.66         | 25.0-23.4   | 31.36      | 35.0-25.7   |
| Crown Cervidae    | 15.2          | 16.4-14.1   | 15.99         | 17.9-14.18  | 20.62      | 25.2-16.3   |
| Crown Cervineae   | 12.55         | 13.9-11.2   | 13.11         | 15.2-11.0   | 15.91      | 19.0-11.9   |
| Crown Cervini     | 7.96          | 9.1-7.0     | 8.38          | 9.8-7.1     | 10.07      | 12.1-8.1    |
| Crown Muntiacini  | 11.21         | 12.5-9.7    | 11.58         | 13.8-9.9    | ?          | ?           |
| Crown Capreolinae | 13.63         | 14.8-12.5   | 14.55         | 16.6-12.7   | 17.85      | 20.9-13.8   |
| Crown Capreolini  | 13.02         | 14.3-11.9   | 13.85         | 15.9-12.0   | 16.98      | 19.9-13.1   |
| Crown Odocoileini | 10.26         | 11.2-9.4    | 11.13         | 12.9-9.6    | 13.51      | 15.9-10.4   |

**Supplementary data 5.** Results of the Principal Component and Canonical Variate Analyses.

All the information are in Dataset2.

**Supplementary data 6.** Different studied structures defined in Supplementary data 3 for the fossils not formally affiliated yet to a subfamily.

1 Semi circular canals and Fenestra vestibule landmarks with associated character measurements of *Homacodon*, *Lagomeryx*, and *Eostyloceros*.

|                    | <i>Homacodon vagans</i>                                                             | <i>Lagomeryx parvulus</i>                                                          | <i>Eostyloceros hezhengensis</i>                                                     |
|--------------------|-------------------------------------------------------------------------------------|------------------------------------------------------------------------------------|--------------------------------------------------------------------------------------|
| Anterior canal     | 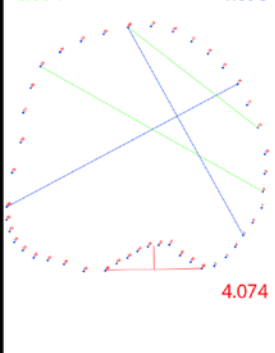   |   |                                                                                      |
| Lateral canal      |   |  |                                                                                      |
| Posterior canal    |  |                                                                                    |  |
| Fenestra vestibuli |  |                                                                                    |                                                                                      |

2 Cochlea landmarks with associated character measurements of *Homacodon*, *Lagomeryx*, and *Eostyloceros*.

|                              | <i>Homacodon vagans</i> | <i>Lagomeryx parvulus</i> | <i>Eostyloceros hezhengensis</i> |
|------------------------------|-------------------------|---------------------------|----------------------------------|
| cochlea first turn coiling   |                         |                           |                                  |
| cochlea first turn width     | 1.143<br>               | 1.176<br>                 | 0.970<br>                        |
| cochlea first turn thickness | 1.240<br>               | 1.373<br>                 | 1.277<br>                        |
| cochlea second turn width    | 3.788<br>               | 4.040<br>                 | 2.678<br>                        |

3 Semi-circular canals and Fenestra vestibule landmarks with associated character measurements of *Euprox*, *Croizetoceros*, and “*Cervus*”.

|                    | <i>Euprox furcatus</i>       | <i>Croizetoceros pyreanicus</i> | <i>Croizetoceros ramosus</i> | “ <i>Cervus</i> ” <i>ruscinensis</i> |
|--------------------|------------------------------|---------------------------------|------------------------------|--------------------------------------|
| Anterior canal     | <p>0.743 0.967<br/>4.390</p> | <p>0.679 1.080<br/>3.507</p>    | <p>0.614 1.005<br/>5.334</p> | <p>0.802 1.112<br/>4.501</p>         |
| Lateral canal      | <p>1.097<br/>6.520</p>       | <p>1.210<br/>6.376</p>          | <p>1.183<br/>8.997</p>       | <p>1.217<br/>8.702</p>               |
| Posterior canal    | <p>1.093 1.035<br/>9.603</p> | <p>1.049 1.026<br/>4.095</p>    | <p>0.916 0.919<br/>4.380</p> | <p>0.883 0.978<br/>5.648</p>         |
| Fenestra vestibuli | <p>1.633</p>                 | <p>1.525</p>                    | <p>1.699?</p>                | <p>1.673?</p>                        |

4 Cochlea landmarks with associated character measurements of *Euprox*, *Croizetoceros*, and “*Cervus*”.

|                              | <i>Euprox furcatus</i>                                                                       | <i>Croizetoceros pyreanicus</i>                                                              | <i>Croizetoceros ramosus</i>                                                                  | “ <i>Cervus</i> ” <i>ruscinensis</i>                                                           |
|------------------------------|----------------------------------------------------------------------------------------------|----------------------------------------------------------------------------------------------|-----------------------------------------------------------------------------------------------|------------------------------------------------------------------------------------------------|
| cochlea first turn coiling   | 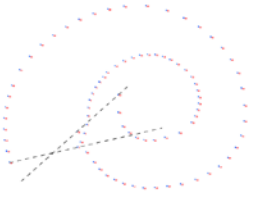            |             |             |             |
| cochlea first turn width     | 0.880<br>  | 0.867<br>  | 0.647?<br> | 0.717<br>  |
| cochlea first turn thickness | 1.342<br> | 1.270<br> | 1.156<br> | 1.442<br> |
| cochlea second turn width    | 3.120<br> | 2.776<br> | 2.965<br> | 3.181<br> |
